# Supplementary material for: Peroxisome Proliferator-Activated Receptor Gamma (PPARγ) Suppresses Inflammation and Bacterial Clearance during Influenza-Bacterial Super-Infection
Source: PubMed Central journal article supplement (PMC6630660; doi:10.3390/v11060505), 2019-06-01
Supplement: viruses-11-00505-s001.pdf [file viruses-11-00505-s001.pdf]

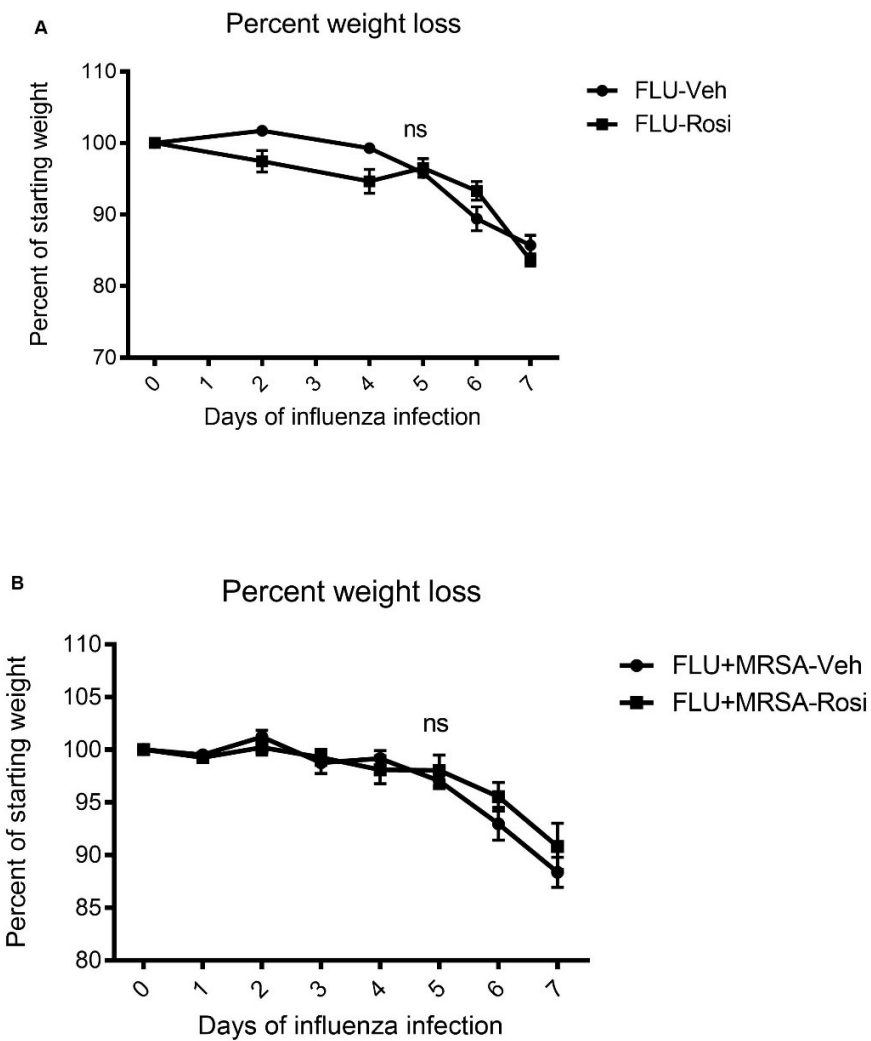

**Figure S1.** Rosiglitazone treatment has no impact on weight loss during influenza and influenza-MRSA super-infection. WT male, 6–8 weeks old mice were infected with 100 pfu of influenza or influenza and MRSA super-infected as described in methods ( $N = 7-8$  per group). Mice were treated with rosiglitazone or vehicle (DMSO) from day 0-6 days post-infection and harvested on day 7 post-infection. **(A)** Percentage weight loss was measured during influenza infection, **(B)** influenza-MRSA super-infection. Data are represented as mean  $\pm$  SEM, two tailed Student's  $t$  test, ns-not significant.
